# Supplementary material
Source: MDPI journal article supplement (https://www.mdpi.com/2073-4441/16/2/236)
Supplement: s1 [file s1]

**Quantitative Detection of VBNC State *Pseudomonas aeruginosa* Contributing to Accurate  
Assessment of Microbial Inactivation in Drinking Water Disinfection**

**(Support information)**

**Zhiheng Fan †, Huichao Zhu †, Chen Tao, Ning Deng \* and Xin Huang \***

School of Environmental and Chemical Engineering, Shanghai University, Shanghai 200444,  
China

\* Correspondence: dengning@shu.edu.cn (N.D.); huangxin2008@shu.edu.cn (X.H.);

Tel.: +86-21-66137761 (N.D.); +86-21-66137748 (X.H.)

† These authors contributed equally to this work.

Submitted to:

**Water**

## Table of Contents

|                                                                                               |   |
|-----------------------------------------------------------------------------------------------|---|
| <b>Figure S1.</b> Standard curve of gene copy number versus Ct value.....                     | 3 |
| <b>Figure S2.</b> Optimization of PMA treatment for <i>P. aeruginosa</i> .....                | 3 |
| <b>Figure S3.</b> Inactivation of <i>P. aeruginosa</i> by NaClO .....                         | 3 |
| <b>Figure S4.</b> Growth curve of <i>P. aeruginosa</i> .....                                  | 4 |
| <b>Table S1.</b> Detection of different proportions of live bacteria using three methods..... | 5 |

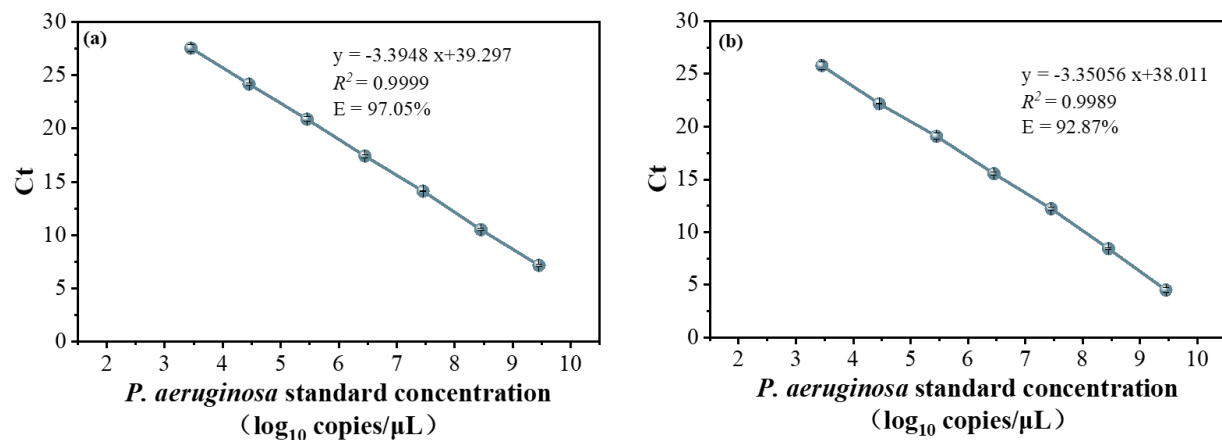

**Figure S1.** Standard curve of gene copy number versus Ct value, *opr-S* primer (a); *opr-L* primer (b)

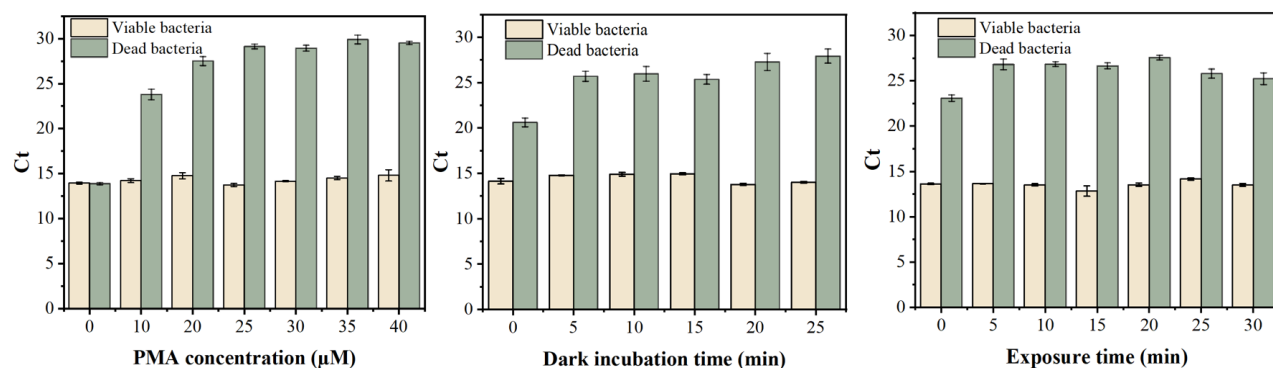

**Figure S2.** Optimization of PMA treatment for *P. aeruginosa*.

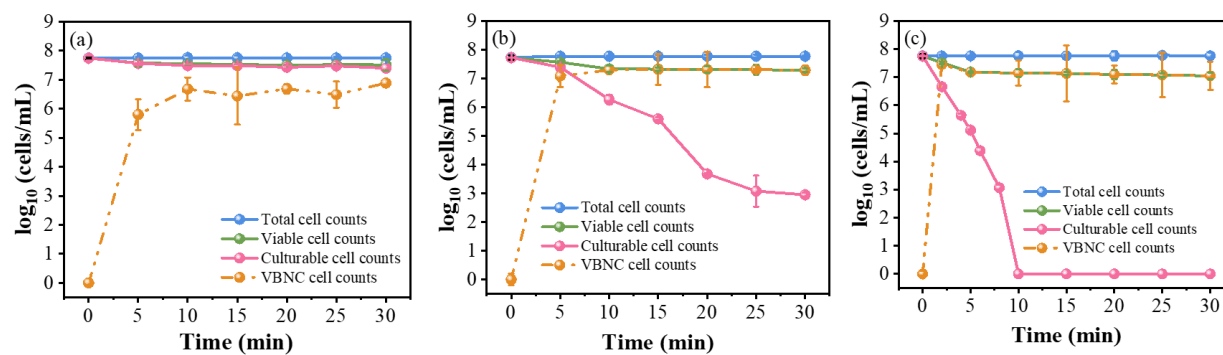

**Figure S3.** Inactivation of *P. aeruginosa* by NaClO. (a) NaClO at 0.5 mg/L, (b) NaClO at 1 mg/L, (c) NaClO at 2 mg/L.

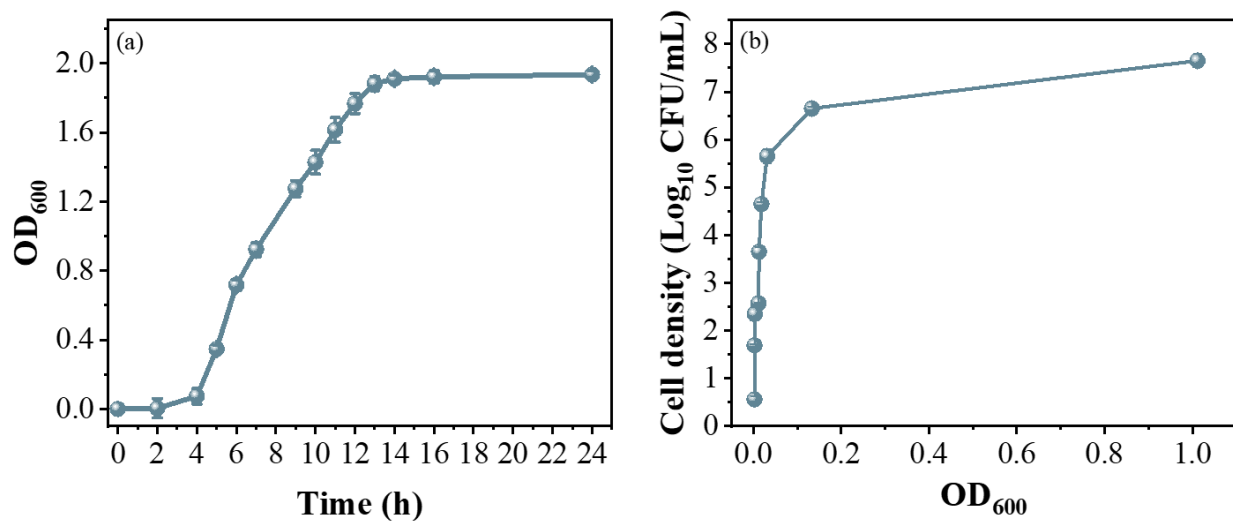

**Figure S4.** Growth curve of *P. aeruginosa* (a); relationship between OD<sub>600</sub> and bacterial load (b)

**Table S1.** Detection of different proportions of live bacteria using three methods

| Viable bacterial<br>proportion (%) | qPCR ( <i>opr-S</i> ) |                                               | PMA-qPCR ( <i>opr-L</i> ) |                                               | HPC                                           |
|------------------------------------|-----------------------|-----------------------------------------------|---------------------------|-----------------------------------------------|-----------------------------------------------|
|                                    | Ct                    | Bacterial count<br>(Log <sub>10</sub> CFU/mL) | Ct                        | Bacterial count<br>(Log <sub>10</sub> CFU/mL) | Bacterial count<br>(Log <sub>10</sub> CFU/mL) |
| 0                                  | 13.70±0.04            | 7.44±0.01                                     | 29.11 ± 0.27              | / (Below the<br>detection limit)              | 0                                             |
| 1                                  | 13.71±0.02            | 7.43±0.01                                     | 21.54±0.31                | 5.53±0.06                                     | 5.50±0.48                                     |
| 5                                  | 13.69±0.06            | 7.44±0.06                                     | 18.82±0.15                | 6.23±0.09                                     | 6.22±0.52                                     |
| 25                                 | 13.74±0.08            | 7.42±0.02                                     | 15.68±0.50                | 7.04±0.05                                     | 7.06±0.69                                     |
| 50                                 | 13.74±0.09            | 7.42±0.02                                     | 15.41±0.20                | 7.11±0.13                                     | 7.12±0.76                                     |
| 75                                 | 13.66±0.20            | 7.45±0.05                                     | 14.33±0.09                | 7.38±0.02                                     | 7.36±0.79                                     |
| 100                                | 13.64±0.06            | 7.45±0.02                                     | 13.75±0.16                | 7.53±0.04                                     | 7.48±0.79                                     |
